# Supplementary material
Source: MDPI journal article supplement (doi:10.3390/horticulturae12030368)
Supplement: s1 [file Supplementary Table 1.pdf › Supplementary Table 1.pdf]

**Supplementary Table S1.** Initial criteria comparison matrices for fuzzy PIPRECIA and Inverse fuzzy PIPRECIA method

| PIPR    | C1  | C2                  | C3                  | C4                  | C5                  | C6                  | C7                  | C8                  | C9                  | C10                 |
|---------|-----|---------------------|---------------------|---------------------|---------------------|---------------------|---------------------|---------------------|---------------------|---------------------|
| DM1     |     | (0.400,0.500,0.667) | (1.400,1.600,1.650) | (1.000,1.000,1.000) | (0.667,1.000,1.000) | (0.400,0.500,0.667) | (1.300,1.450,1.500) | (1.000,1.000,1.000) | (0.667,1.000,1.000) | (1.300,1.450,1.500) |
| DM2     |     | (1.100,1.150,1.200) | (1.500,1.750,1.800) | (1.300,1.450,1.500) | (0.400,0.500,0.667) | (1.200,1.300,1.350) | (1.000,1.000,1.050) | (1.000,1.000,1.000) | (1.000,1.000,1.000) | (1.100,1.150,1.200) |
| DM3     |     | (1.000,1.000,1.000) | (1.400,1.600,1.650) | (1.000,1.000,1.000) | (0.400,0.500,0.667) | (1.300,1.450,1.500) | (1.000,1.000,1.000) | (1.000,1.000,1.000) | (1.000,1.000,1.000) | (1.000,1.000,1.000) |
| DM4     |     | (0.400,0.500,0.667) | (1.500,1.750,1.800) | (1.000,1.000,1.000) | (0.667,1.000,1.000) | (0.400,0.500,0.667) | (1.300,1.450,1.500) | (1.000,1.000,1.000) | (1.000,1.000,1.000) | (1.100,1.150,1.200) |
| PIPR -I | C10 | C9                  | C8                  | C7                  | C6                  | C5                  | C4                  | C3                  | C2                  | C1                  |
| DM1     |     | (0.333,0.400,0.500) | (1.100,1.150,1.200) | (1.000,1.000,1.000) | (0.333,0.400,0.500) | (1.200,1.300,1.350) | (1.000,1.000,1.050) | (1.000,1.000,1.000) | (0.286,0.333,0.400) | (1.200,1.300,1.350) |
| DM2     |     | (0.667,1.000,1.000) | (1.000,1.000,1.000) | (1.000,1.000,1.000) | (0.667,1.000,1.000) | (0.400,0.500,0.667) | (1.200,1.300,1.350) | (0.333,0.400,0.500) | (0.250,0.286,0.333) | (0.667,1.000,1.000) |
| DM3     |     | (1.000,1.000,1.000) | (1.000,1.000,1.000) | (1.000,1.000,1.000) | (1.000,1.000,1.000) | (0.333,0.400,0.500) | (1.200,1.300,1.350) | (1.000,1.000,1.000) | (0.286,0.333,0.400) | (1.000,1.000,1.000) |
| DM4     |     | (0.667,1.000,1.000) | (1.000,1.000,1.000) | (1.000,1.000,1.000) | (0.333,0.400,0.500) | (1.200,1.300,1.350) | (1.000,1.000,1.050) | (1.000,1.000,1.000) | (0.250,0.286,0.333) | (1.200,1.300,1.350) |

Criteria abbreviations provided under Table 2. PIPR: fuzzy PIPRECIA, PIPR -I: inverse fuzzy PIPRECIA, DM: decision-maker response.
