# Supplementary material
Source: MDPI journal article supplement (doi:10.3390/horticulturae12030368)
Supplement: s1 [file Supplementary Table 2.pdf › Supplementary Table 2.pdf]

Supplementary Table S2. Fuzzy weights of the criteria

| C  | C1                  | C2                  | C3                  | C4                  | C5                  | C6                  | C7                  | C8                  | C9                  | C10                 |
|----|---------------------|---------------------|---------------------|---------------------|---------------------|---------------------|---------------------|---------------------|---------------------|---------------------|
| wi | (0.029,0.051,0.098) | (0.025,0.042,0.084) | (0.045,0.099,0.227) | (0.052,0.113,0.256) | (0.041,0.091,0.214) | (0.046,0.093,0.221) | (0.065,0.123,0.284) | (0.065,0.123,0.284) | (0.062,0.120,0.280) | (0.083,0.145,0.347) |

Abbreviations: Wi: weight coefficient. Criteria abbreviations provided under Table 2.
