# Supplementary material
Source: MDPI journal article supplement (doi:10.3390/horticulturae12030368)
Supplement: s1 [file Supplementary Table 3.pdf › Supplementary Table 3.pdf]

**Supplementary Table S3.** Fuzzy weighted normalised decision matrix

| A   | C1                  | C2                  | C3                  | C4                  | C5                  | C6                  | C7                  | C8                  | C9                  | C10                 |
|-----|---------------------|---------------------|---------------------|---------------------|---------------------|---------------------|---------------------|---------------------|---------------------|---------------------|
| AAI | (0.006,0.010,0.033) | (0.005,0.008,0.017) | (0.015,0.042,0.097) | (0.006,0.038,0.085) | (0.005,0.010,0.024) | (0.015,0.031,0.074) | (0.009,0.018,0.041) | (0.007,0.041,0.095) | (0.007,0.017,0.040) | (0.012,0.021,0.050) |
| A1  | (0.010,0.017,0.098) | (0.005,0.025,0.050) | (0.015,0.042,0.097) | (0.017,0.038,0.142) | (0.032,0.071,0.214) | (0.015,0.031,0.074) | (0.028,0.053,0.203) | (0.022,0.041,0.158) | (0.021,0.040,0.280) | (0.012,0.062,0.149) |
| A2  | (0.029,0.051,0.098) | (0.005,0.008,0.017) | (0.027,0.099,0.227) | (0.017,0.038,0.142) | (0.023,0.051,0.166) | (0.015,0.031,0.074) | (0.009,0.053,0.122) | (0.007,0.041,0.095) | (0.062,0.120,0.280) | (0.012,0.021,0.050) |
| A3  | (0.006,0.017,0.033) | (0.005,0.008,0.050) | (0.027,0.099,0.227) | (0.017,0.038,0.142) | (0.005,0.010,0.071) | (0.015,0.031,0.221) | (0.009,0.053,0.122) | (0.036,0.068,0.221) | (0.021,0.040,0.280) | (0.012,0.021,0.050) |
| A4  | (0.006,0.010,0.033) | (0.005,0.025,0.050) | (0.027,0.059,0.227) | (0.017,0.063,0.142) | (0.005,0.010,0.024) | (0.015,0.031,0.221) | (0.028,0.088,0.203) | (0.036,0.095,0.221) | (0.012,0.040,0.093) | (0.012,0.021,0.149) |
| A5  | (0.010,0.017,0.098) | (0.015,0.025,0.084) | (0.019,0.042,0.136) | (0.006,0.038,0.085) | (0.023,0.071,0.166) | (0.015,0.031,0.074) | (0.028,0.053,0.203) | (0.050,0.095,0.284) | (0.012,0.040,0.093) | (0.035,0.062,0.248) |
| A6  | (0.010,0.051,0.098) | (0.005,0.008,0.017) | (0.027,0.099,0.227) | (0.006,0.038,0.085) | (0.032,0.071,0.214) | (0.015,0.031,0.074) | (0.028,0.088,0.203) | (0.036,0.068,0.221) | (0.021,0.120,0.280) | (0.012,0.021,0.050) |
| A7  | (0.010,0.017,0.098) | (0.015,0.025,0.084) | (0.019,0.042,0.136) | (0.006,0.038,0.085) | (0.032,0.071,0.214) | (0.015,0.031,0.074) | (0.046,0.088,0.284) | (0.050,0.095,0.284) | (0.007,0.017,0.040) | (0.035,0.104,0.248) |
| A8  | (0.010,0.051,0.098) | (0.005,0.008,0.017) | (0.027,0.099,0.227) | (0.017,0.038,0.142) | (0.023,0.071,0.166) | (0.015,0.031,0.074) | (0.046,0.088,0.284) | (0.036,0.068,0.221) | (0.009,0.024,0.056) | (0.012,0.021,0.050) |
| A9  | (0.010,0.017,0.098) | (0.005,0.025,0.050) | (0.019,0.059,0.136) | (0.040,0.088,0.256) | (0.005,0.010,0.024) | (0.015,0.093,0.221) | (0.009,0.018,0.041) | (0.050,0.123,0.284) | (0.007,0.017,0.040) | (0.012,0.021,0.149) |
| A10 | (0.010,0.017,0.098) | (0.005,0.025,0.050) | (0.019,0.059,0.136) | (0.029,0.088,0.199) | (0.014,0.030,0.119) | (0.015,0.031,0.221) | (0.009,0.018,0.041) | (0.050,0.095,0.284) | (0.007,0.017,0.040) | (0.012,0.021,0.149) |
| A11 | (0.010,0.017,0.098) | (0.015,0.042,0.084) | (0.019,0.042,0.136) | (0.006,0.038,0.085) | (0.032,0.071,0.214) | (0.015,0.031,0.074) | (0.046,0.123,0.284) | (0.050,0.123,0.284) | (0.007,0.017,0.040) | (0.059,0.104,0.347) |
| A12 | (0.010,0.051,0.098) | (0.005,0.008,0.017) | (0.027,0.099,0.227) | (0.017,0.038,0.142) | (0.032,0.071,0.214) | (0.015,0.031,0.074) | (0.028,0.088,0.203) | (0.050,0.095,0.284) | (0.009,0.024,0.056) | (0.012,0.021,0.149) |
| AI  | (0.029,0.051,0.098) | (0.015,0.042,0.084) | (0.027,0.099,0.227) | (0.040,0.088,0.256) | (0.032,0.071,0.214) | (0.015,0.093,0.221) | (0.046,0.123,0.284) | (0.050,0.123,0.284) | (0.062,0.120,0.280) | (0.059,0.104,0.347) |

Abbreviations under Table 12
